# Supplementary material for: Anti-aging effect of extracellular vesicles from mesenchymal stromal cells on senescence-induced chondrocytes in osteoarthritis
Source: publisher site journal article supplement (doi:10.18632/aging.206158), 2024-11-22
Supplement: Supplementary file [file aging-vnull-206158-supplementary-material-SD1.pdf]

**SUPPLEMENTARY FIGURE**

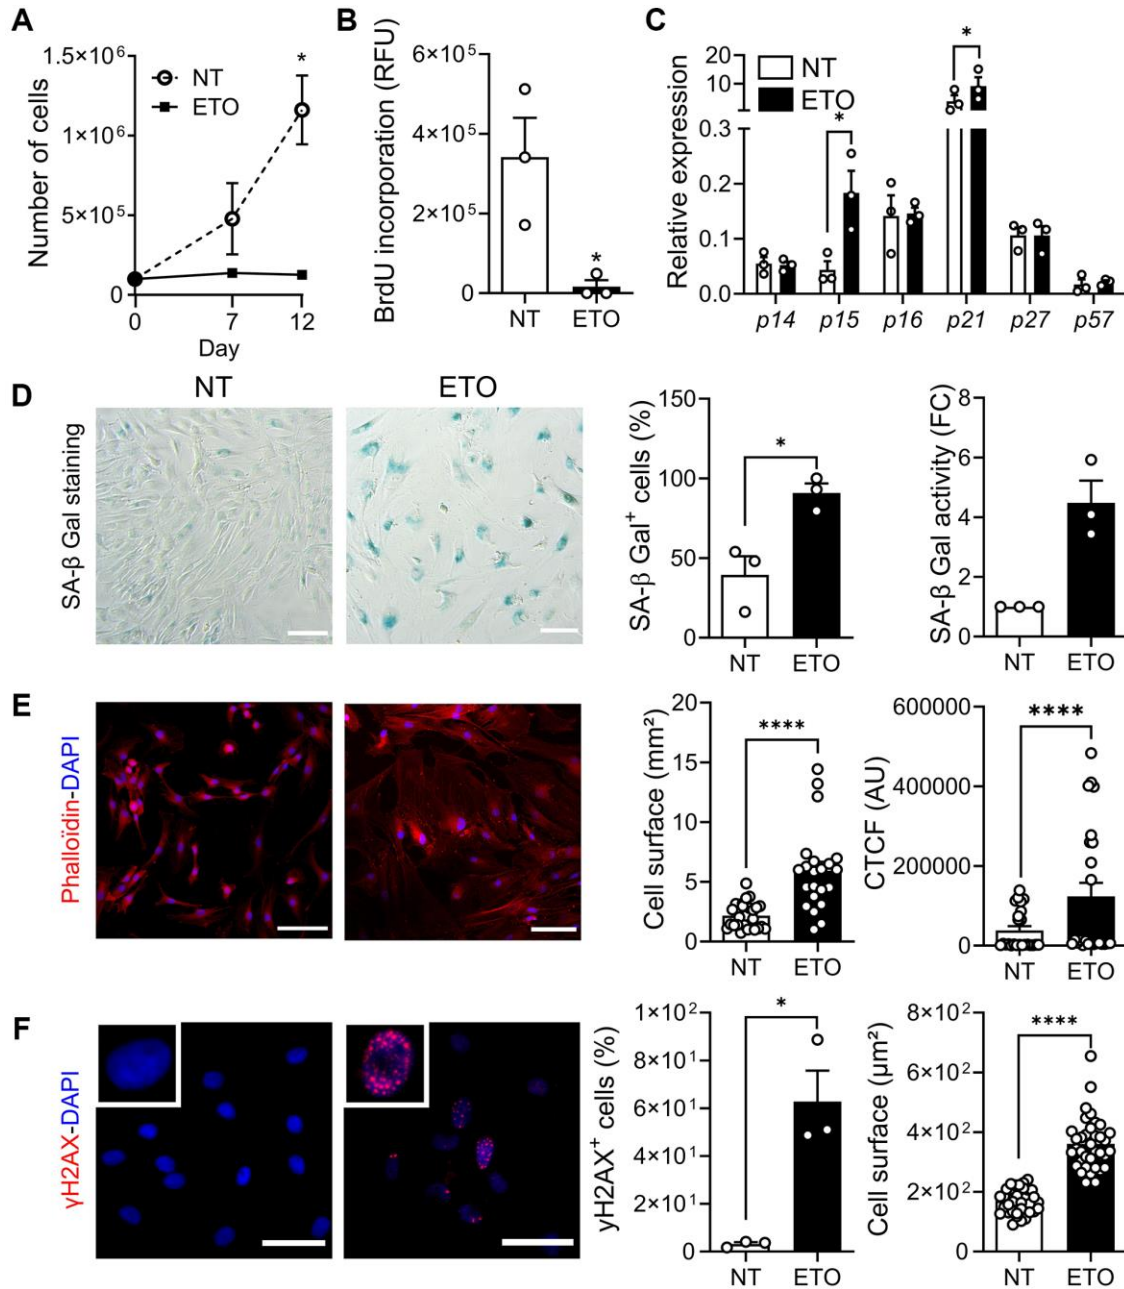

**Supplementary Figure 1. Characterization of etoposide-induced senescence in human chondrocytes at twelve days.** (A) Cumulative number of cells in non-treated (NT) and etoposide (ETO)-treated human OA chondrocytes ( $n = 3, 4$ ). (B) Level of BrdU incorporation in NT and ETO-treated chondrocytes at day 12 ( $n = 3$ ). (C) Relative expression of Cyclin-Dependent Kinase Inhibitors in chondrocytes ( $n = 3$ ). (D) Representative pictures of SA-β-Gal staining in NT and ETO chondrocytes (left panel). Percentage of SA-β-Gal positive cells ( $n = 3$ ) and SA β-Gal activity quantified by fluorometry ( $n = 3$ ) (right panels). (E) Staining of actin stress fibers with phalloidin (red) and nuclei with DAPI (blue). Bars: 100 μm (left panel). Quantification of cell surface ( $n = 22-30$ ) and corrected total cell fluorescence (CTCF) ( $n = 24$ ) (right panels). (F) Representative pictures of nuclei stained with DAPI (blue) and γH2AX-positive foci in chondrocytes (red). Bars: 50 μm (left panel). Percentage of chondrocytes with γH2AX foci in nuclei ( $n = 3$ ) and quantification of nucleus surface ( $n = 36$ ) (right panels). Data are shown as mean ± SEM. Statistical analysis used the Mann-Whitney test (A–D and F: left panel) or the Wilcoxon signed rank test (D: right panel) or the unpaired *t*-test (E, F: right panel), for pair-wised comparisons versus the NT group. \* $p < 0.05$ , \*\*\*\* $p < 0.0001$ .
